# Supplementary material
Source: Springer Nature journal article supplement (https://www.springermedizin.de/resource/supplementary/13058_2012_3149_MOESM3_ESM.pdf/9703166)
Supplement: MOESM3 [file 9703166]

SURVIVAL PROBABILITY

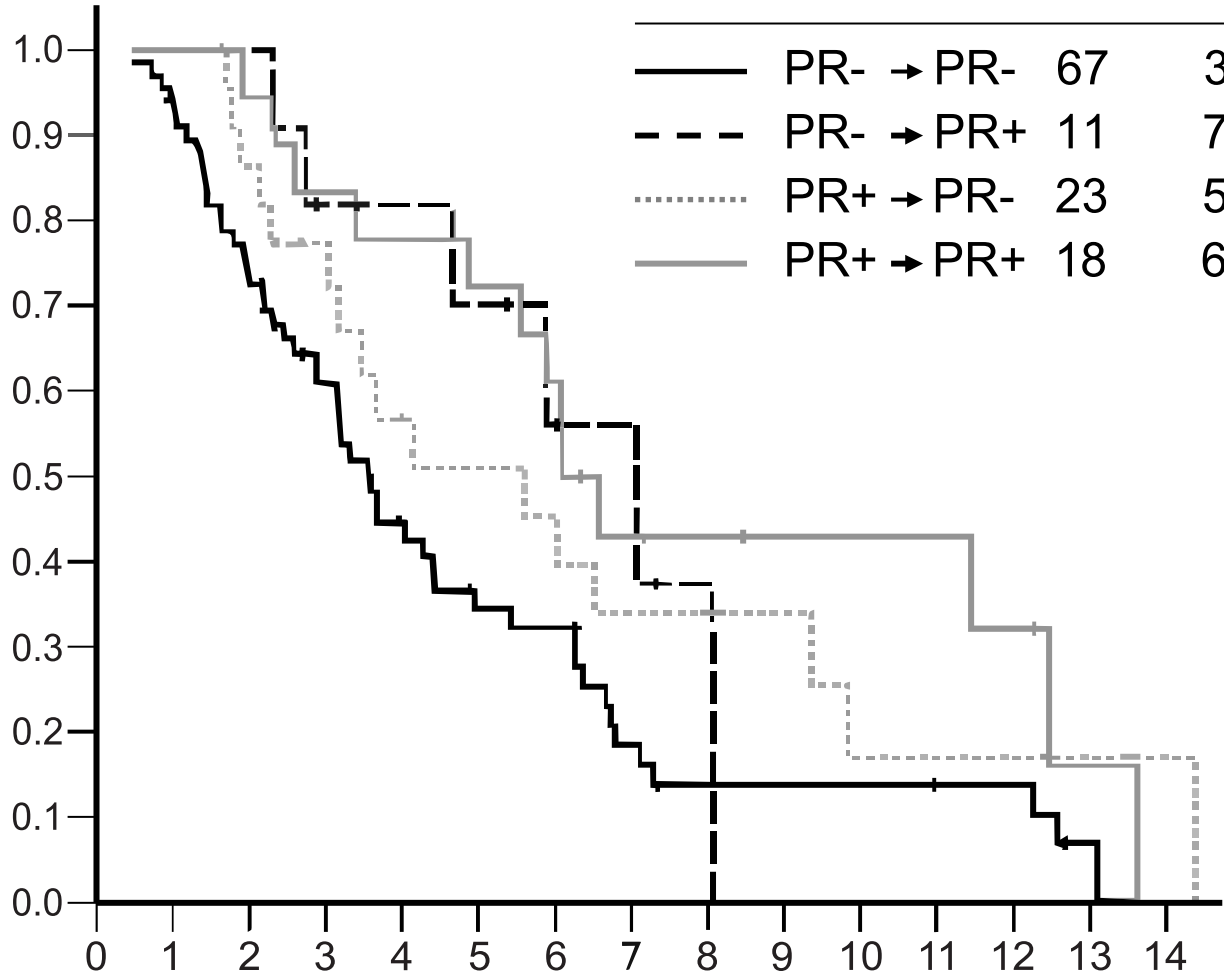

GROUP N MEDIAN SURVIVAL

PR- → PR- 67 3.6 years  
PR- → PR+ 11 7.1 years  
PR+ → PR- 23 5.6 years  
PR+ → PR+ 18 6.1 years

YEARS
